# Supplementary material for: Evaluation of photoanode materials used in biophotovoltaic systems for renewable energy generation
Source: Royal Society of Chemistry journal article supplement (doi:10.1039/d1se00396h), 2021-01-01
Supplement: d1se00396h1.pdf [file d1se00396h1.pdf]

### Supplementary material

**Table S1: The performance efficiency (%) of biophotovoltaic (BPV) systems reported in past two decades**

| BES setup                                            | Anode                                        | Light intensity (Wm <sup>-2</sup> ) | Power density (mWm <sup>-2</sup> ) | Efficiency (%) | Reference |
|------------------------------------------------------|----------------------------------------------|-------------------------------------|------------------------------------|----------------|-----------|
| Single chamber photosynthetic microbial fuel cell    | Platinum                                     | 6.5                                 | 0.132                              | 0.002          | 72        |
| Single chamber photosynthetic microbial fuel cell    | Platinum                                     | 6.5                                 | 5                                  | 0.076          | 73        |
| Multichannel BPV with open air cathode               | Stainless steel                              | 8                                   | 5.05                               | 0.063          | 55        |
| Photo-Microbial fuel cell                            | Carbon cloth                                 | 12.1                                | 0.2                                | 0.001          | 59        |
| Multichannel BPV with open air cathode               | Carbon paper                                 | 8                                   | 2.05                               | 0.025          | 55        |
| Dual chamber microbial fuel cell                     | Graphite rod                                 | 4.5                                 | 0.82                               | 0.018          | 109       |
| Photo microbial fuel cell                            | Graphite rod                                 | 2.7                                 | 12.947                             | 0.479          | 111       |
| Photo microbial fuel cell                            | Osmium redox polymer-modified graphite rod   | 440                                 | 481.5                              | 0.001          | 118       |
| Photo bioelectrochemical cell with enzymatic cathode | Multiwalled carbon nanotubes on carbon paper | 17.4                                | 35                                 | 0.201          | 102       |
| Dual chamber photo microbial fuel cell               | Graphite plates                              | 6.5                                 | 0.0084                             | 0.00012        | 110       |
| Single chamber BPV with air cathode                  | Carbon nanotubes                             | 10.9                                | 0.38                               | 0.003          | 103       |
| Single chamber open air BPV                          | ITO coated PET                               | 50                                  | 0.696                              | 0.001          | 53        |
| Single chamber open air BPV                          | ITO coated PET                               | 10                                  | 10                                 | 0.1            | 29        |
| Photo microbial fuel cell                            | FTO coated ceramics                          | 12                                  | 14                                 | 0.116          | 59        |
| Photo-Microbial fuel cell                            | FTO coated glass                             | 12                                  | 24                                 | 0.2            | 59        |
| Multichannel BPV with open air cathode               | ITO coated PET                               | 8                                   | 23.6                               | 0.295          | 55        |

|                                          |                        |      |        |        |                |
|------------------------------------------|------------------------|------|--------|--------|----------------|
| Photosynthetic MFC with air cathode      | ITO coated glass slide | 20   | 0.0248 | 0.0001 | <sup>128</sup> |
| Single chamber BPV with open air cathode | ITO coated PET         | 8.72 | 0.039  | 0.0004 | <sup>17</sup>  |
| Single chamber BPV with open air cathode | ITO coated glass       | 6.5  | 0.313  | 0.004  | <sup>24</sup>  |
| BPV with air cathode                     | ITO coated PET         | 109  | 4.37   | 0.004  | <sup>23</sup>  |

Power density was calculated by normalizing the power output to the surface area of anode; unit conversion for light intensity was performed according to the coefficient values of Plant Growth Chamber Handbook <sup>79</sup>; efficiency (%) was calculated using the following formula, Efficiency (%) = power output ( $W\ m^{-2}$ ) / input of light intensity ( $W\ m^{-2}$ )  $\times 100$

**Table S2: Insufficient data to calculate performance efficiency (%) of BPV system reported in past two**

| Study                    | Light intensity                                       | Power density             | Efficiency (%) |
|--------------------------|-------------------------------------------------------|---------------------------|----------------|
| (Samsonoff et al., 2014) | □                                                     | 0.0057 mW m <sup>-2</sup> | ✖              |
| (Cereda et al., 2014)    | 20 W m <sup>2</sup>                                   | □                         | ✖              |
| (Wei et al., 2016)       | □                                                     | 8 mW m <sup>-2</sup>      | ✖              |
| (Sekar et al., 2016)     | 80 $\mu$ mole photons m <sup>2</sup> s <sup>-1</sup>  | 10 mA m <sup>-2</sup>     | ♦              |
| (Hasan et al., 2017)     | 40 mW cm <sup>2</sup>                                 | □                         | ✖              |
| (Liu and Choi, 2017)     | □                                                     | 438 mW m <sup>-2</sup>    | ✖              |
| (Li et al., 2019)        | 49 $\mu$ mole photons m <sup>2</sup> s <sup>-1</sup>  | 1108.9 mW m <sup>-3</sup> | ♦              |
| (Yang et al., 2019)      | 100 $\mu$ mole photons m <sup>2</sup> s <sup>-1</sup> | 2.34 W m <sup>-3</sup>    | ♦              |
| (Wang et al., 2018)      | □                                                     | 4.06 mW m <sup>-2</sup>   | ✖              |

decades

Efficiency (%) was calculated in this study using the following formula, Efficiency (%) = power output ( $W\ m^{-2}$ ) / input of light intensity ( $W\ m^{-2}$ )  $\times 100$ ; □ data not provided; ✖ cannot be calculated due to source providing insufficient data; ♦ cannot be calculated due to source only providing current density or power density in non-convertible format
